# Supplementary material for: A Comprehensive Study of Vesicular and Non-Vesicular miRNAs from a Volume of Cerebrospinal Fluid Compatible with Clinical Practice
Source: PubMed Central journal article supplement (PMC6643433; doi:10.7150/thno.31502), 2019-06-19
Supplement: thnov09p4567s1.pdf [file thnov09p4567s1.pdf]

**SUPPLEMENTARY MATERIALS**

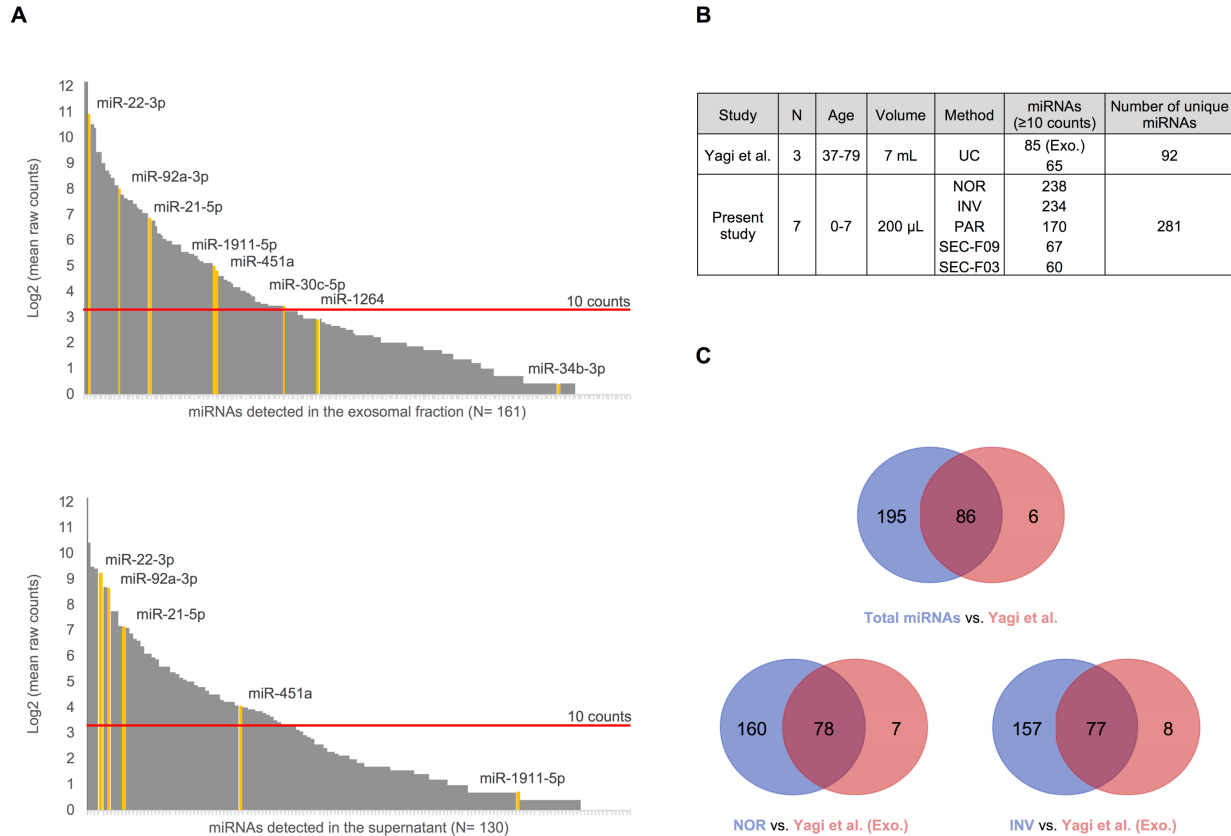

**Figure S1.** Comparison of the data obtained here with the results of Yagi et al. [15]. **A**, each miRNA identified detected by Yagi et al. (x-axis) and the number of raw reads on a logarithmic scale (y-axis). Only the eight miRNAs selected as reference miRNAs for this study are highlighted in orange. The horizontal line indicates the threshold chosen to accept a miRNA as detected (10 or more counts). **B**, the summary of the two studies and the number of miRNAs detected by each method. **C**, Venn diagrams showing the number of common miRNAs detected between our study and the one by Yagi et al. in the exosomal fraction (Exo.) (*upper part*), as well as by the NOR and INV protocols in comparison with Yagi et al. (*lower part*). Abbreviations: ultracentrifugation (UC), miRCURY Exosome Isolation Kit from Qiagen (QIA), Total Exosome Isolation Reagent from Invitrogen (INV), miRvana PARIS Kit from Ambion (PAR), and Plasma/Serum RNA Purification Kit from Norgen (NOR).

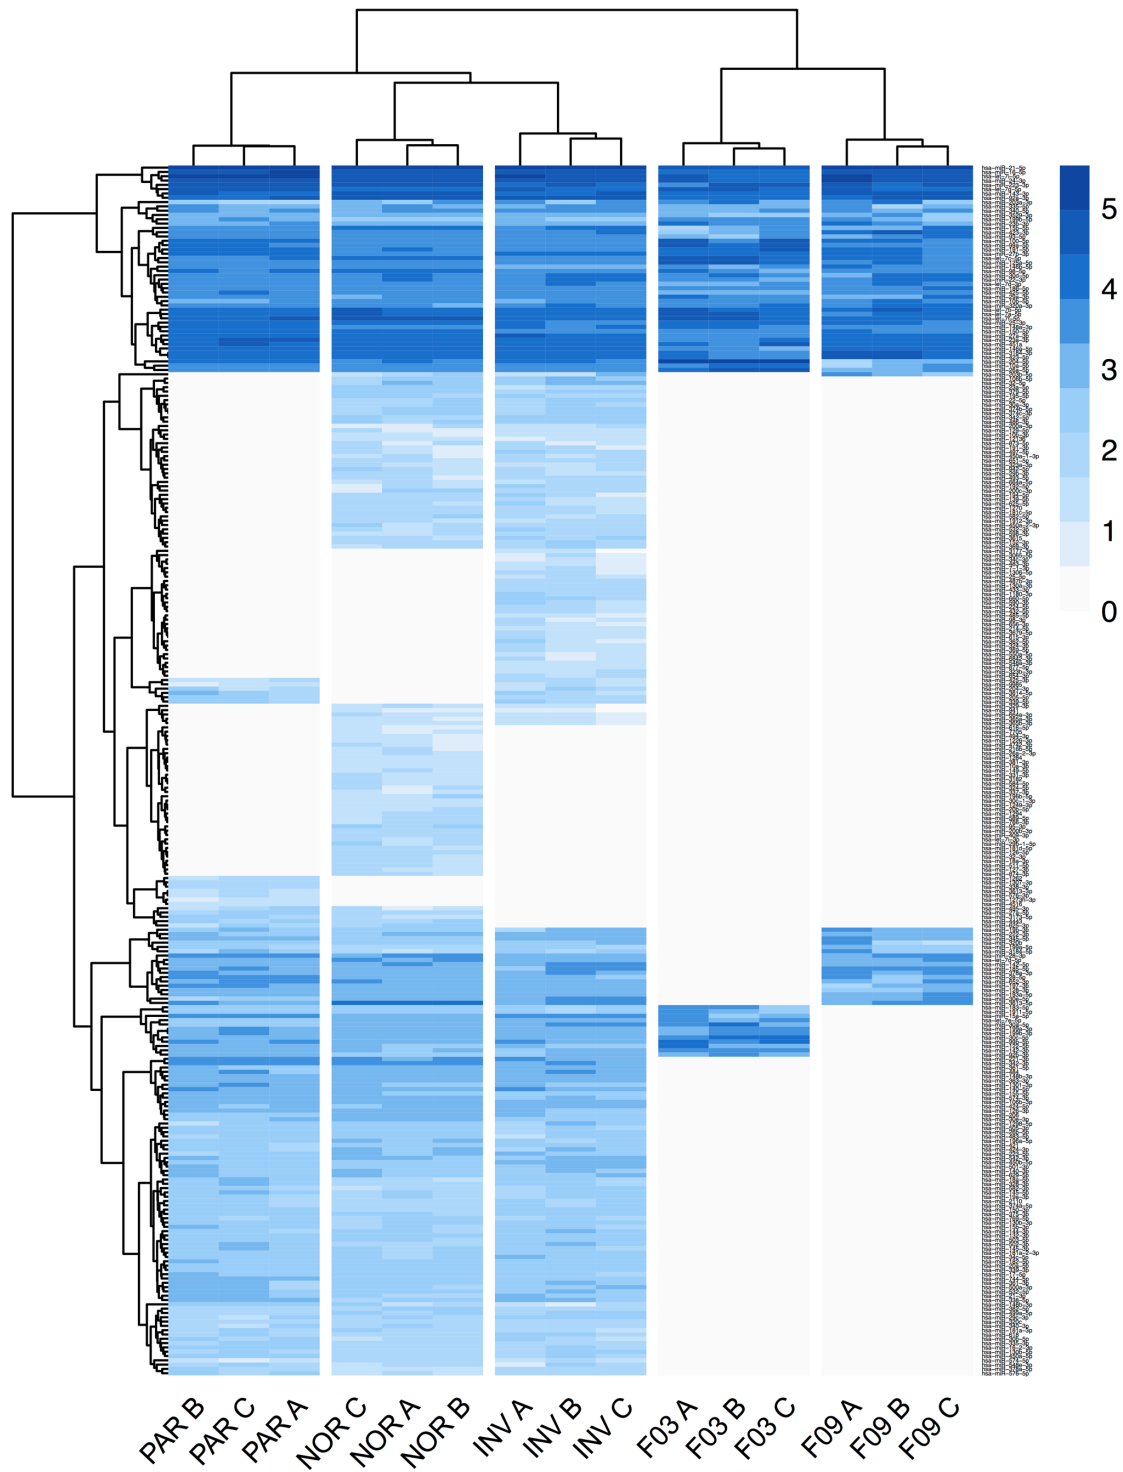

**Figure S2.** Heatmap representing the abundance of each miRNA for the compared methods. The smallRNAseq counts (10 or more) were TMM-normalized and represented on the logarithmic scale. The darkest blue bars represent the highest abundance and the white bars, the lowest. Each method was assessed in triplicate.

**A**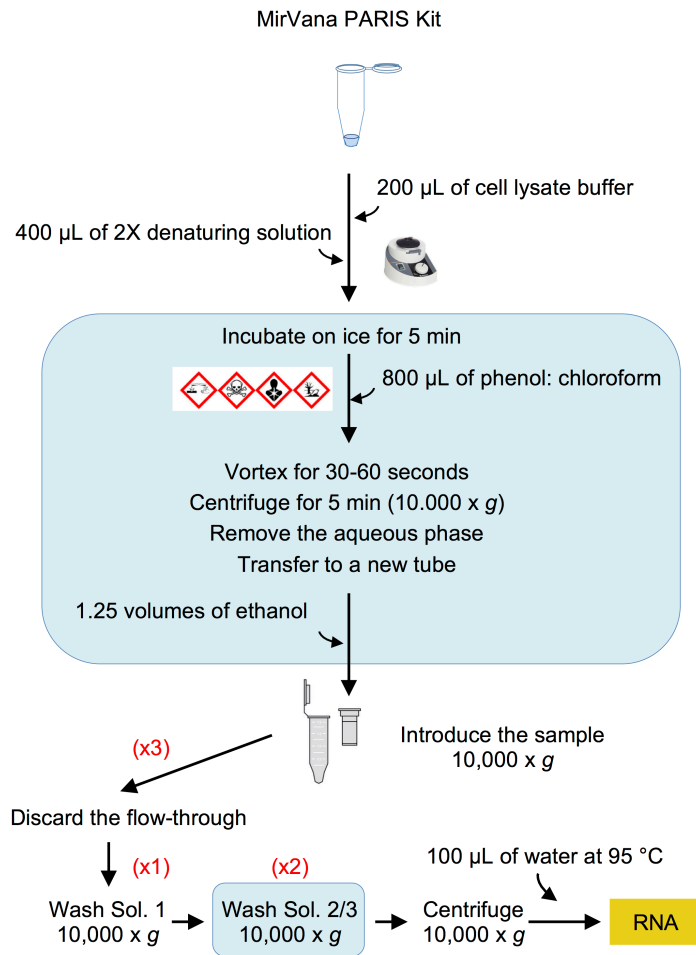**B**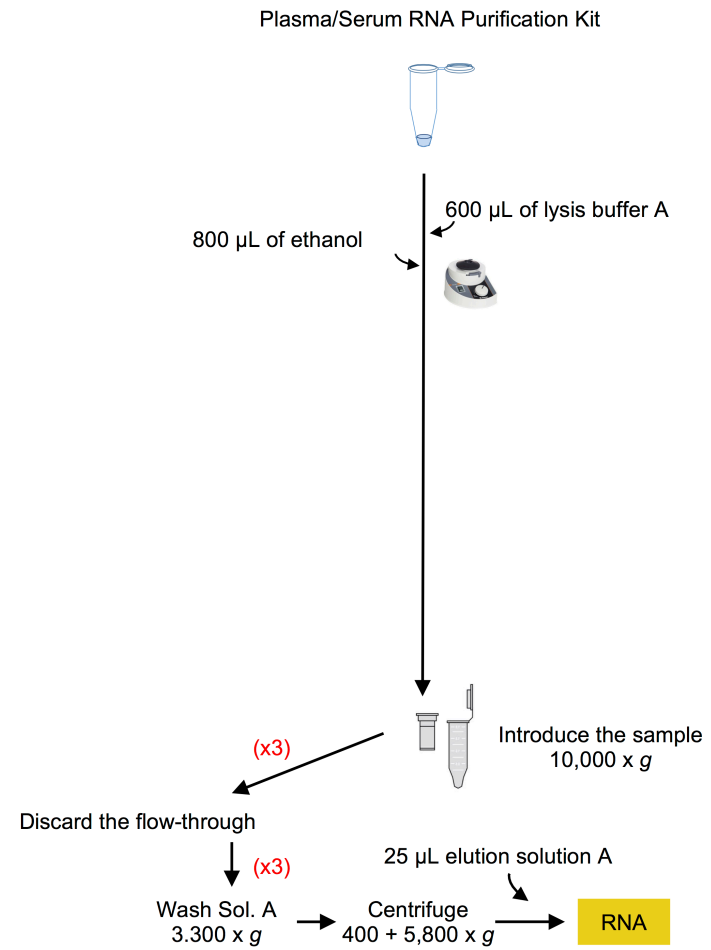

**Figure S3.** Comparison of the two RNA extraction protocols used in this work: **A**, using mirVana PARIS Kit from Ambion and **B**, using the Plasma/Serum RNA Purification Kit from Norgen.

**Table S1.** Results of sequencing and computational post-processing. The green color represents the highest percentage of alignment against the human genome and the red one, the lowest. Abbreviations: mirVana PARIS Kit from Ambion (PAR), Total Exosome Isolation Reagent from Invitrogen (INV), Plasma/Serum RNA Purification Kit from Norgen (NOR), and the fractions 3 (F03) and 9 (F09) of the SEC.

| Method | Sample | Total reads | Reads aligned with the genome |      | Read counts aligned with miRBase22 |     | Average coverage depth | Average length | Average quality | %GC  |
|--------|--------|-------------|-------------------------------|------|------------------------------------|-----|------------------------|----------------|-----------------|------|
|        |        |             | N                             | %    | N                                  | %   |                        |                |                 |      |
| DIR    | DIR_A  | 26438319    | 18470770                      | 69.9 | 1249070                            | 0.1 | 104.4                  | 25.8           | 37.0            | 52.7 |
|        | DIR_B  | 28440884    | 18818832                      | 66.2 | 1392689                            | 0.2 | 74.7                   | 24.5           | 37.0            | 53.0 |
|        | DIR_C  | 30495052    | 19466510                      | 63.8 | 1086513                            | 0.2 | 74.5                   | 23.7           | 37.0            | 53.6 |
| F03    | F03_A  | 25958614    | 9004682                       | 34.7 | 243519                             | 0.1 | 60.5                   | 20.2           | 36.8            | 55.2 |
|        | F03_B  | 19540619    | 9312030                       | 47.7 | 65634                              | 0.2 | 25.0                   | 18.2           | 36.8            | 55.4 |
|        | F03_C  | 25243946    | 10856518                      | 43.0 | 84024                              | 0.4 | 17.2                   | 18.4           | 36.8            | 55.7 |
| F09    | F09_A  | 22831445    | 10171399                      | 44.5 | 140001                             | 0.2 | 36.8                   | 18.5           | 36.8            | 56.3 |
|        | F09_B  | 24304724    | 11901408                      | 49.0 | 121530                             | 0.2 | 34.4                   | 18.3           | 36.8            | 56.0 |
|        | F09_C  | 21646255    | 10867442                      | 50.2 | 938047                             | 0.1 | 87.2                   | 23.1           | 37.0            | 53.2 |
| INV    | INV_A  | 27875522    | 14743858                      | 52.9 | 1966654                            | 0.3 | 33.6                   | 18.8           | 36.8            | 53.1 |
|        | INV_B  | 22467111    | 16583184                      | 73.8 | 6942463                            | 0.2 | 68.5                   | 21.0           | 36.9            | 48.5 |
|        | INV_C  | 26656900    | 18972809                      | 71.2 | 7027026                            | 0.2 | 74.9                   | 20.9           | 36.9            | 49.4 |
| NOR    | NOR_A  | 32689429    | 29545751                      | 90.4 | 1890229                            | 0.1 | 267.9                  | 29.5           | 37.2            | 50.9 |
|        | NOR_B  | 32771511    | 25542919                      | 77.9 | 1511752                            | 0.3 | 77.9                   | 27.6           | 37.1            | 51.1 |
|        | NOR_C  | 34307902    | 28037677                      | 81.7 | 1306748                            | 0.2 | 119.1                  | 28.1           | 37.1            | 51.5 |

**Table S2.** The complete list of the 234 miRNAs detected by smallRNAseq using the INV protocol and their TMM-normalized counts obtained using the INV protocol. The 30 miRNAs that were specifically detected by INV are highlighted in blue and marked with an asterisk (\*). INV\_A, INV\_B, and INV\_C indicate each of the triplicates analyzed.

| Name             | Normalized counts |           |           |
|------------------|-------------------|-----------|-----------|
|                  | INV_A             | INV_B     | INV_C     |
| *hsa-miR-1180-3p | 253.22            | 134.10    | 57.92     |
| *hsa-miR-660-5p  | 163.73            | 174.58    | 77.13     |
| *hsa-miR-590-3p  | 206.95            | 116.67    | 27.61     |
| *hsa-miR-433-3p  | 68.14             | 157.00    | 97.34     |
| *hsa-miR-130a-3p | 82.37             | 143.61    | 50.09     |
| *hsa-miR-487b-3p | 81.86             | 60.64     | 117.12    |
| *hsa-miR-362-5p  | 197.80            | 29.67     | 11.10     |
| *hsa-miR-432-5p  | 114.92            | 88.59     | 30.88     |
| *hsa-miR-224-5p  | 106.78            | 53.30     | 32.87     |
| *hsa-miR-324-3p  | 135.26            | 15.12     | 26.90     |
| *hsa-miR-3065-5p | 5.08              | 150.67    | 11.67     |
| *hsa-miR-1306-5p | 65.09             | 80.52     | 11.53     |
| *hsa-miR-25-5p   | 44.24             | 78.36     | 25.33     |
| *hsa-miR-7-1-3p  | 24.41             | 111.20    | 10.67     |
| *hsa-miR-654-3p  | 60.51             | 16.85     | 65.89     |
| *hsa-miR-369-5p  | 81.86             | 23.48     | 25.47     |
| *hsa-miR-323b-3p | 20.85             | 21.17     | 80.40     |
| *hsa-miR-656-3p  | 77.80             | 23.77     | 7.97      |
| *hsa-miR-3679-5p | 58.98             | 36.44     | 13.80     |
| *hsa-miR-615-3p  | 55.42             | 33.56     | 13.23     |
| *hsa-miR-6842-3p | 63.56             | 3.60      | 25.62     |
| *hsa-miR-98-3p   | 55.93             | 12.24     | 20.21     |
| *hsa-miR-214-5p  | 38.64             | 31.40     | 13.52     |
| *hsa-miR-548a-3p | 29.49             | 13.68     | 33.02     |
| *hsa-miR-877-5p  | 20.85             | 27.08     | 26.18     |
| *hsa-miR-483-3p  | 21.86             | 40.62     | 10.67     |
| *hsa-miR-485-5p  | 39.15             | 13.68     | 9.82      |
| *hsa-miR-34c-3p  | 12.71             | 38.46     | 10.39     |
| *hsa-miR-3177-3p | 28.98             | 23.91     | 1.57      |
| *hsa-miR-550a-5p | 19.32             | 5.91      | 27.04     |
| hsa-miR-21-5p    | 199674.68         | 305318.16 | 334780.32 |
| hsa-miR-16-5p    | 83888.17          | 61814.95  | 57789.17  |
| hsa-let-7i-5p    | 124088.43         | 35838.43  | 42205.76  |
| hsa-miR-92a-3p   | 48643.03          | 61627.41  | 51851.52  |
| hsa-miR-24-3p    | 47785.73          | 38130.85  | 60769.24  |
| hsa-miR-143-3p   | 25078.64          | 25016.34  | 34675.98  |
| hsa-miR-27a-3p   | 35869.55          | 24684.32  | 14426.16  |
| hsa-miR-223-3p   | 19892.16          | 31949.18  | 21076.48  |
| hsa-let-7g-5p    | 39505.17          | 14256.32  | 17936.75  |
| hsa-miR-3184-3p  | 21067.25          | 16845.03  | 21471.67  |
| hsa-miR-423-5p   | 21067.25          | 16845.03  | 21471.67  |
| hsa-miR-451a     | 22932.35          | 23778.74  | 12567.76  |
| hsa-let-7f-5p    | 23255.74          | 13059.05  | 21055.85  |
| hsa-let-7b-5p    | 14439.75          | 21115.56  | 21195.17  |

|                 |          |          |          |
|-----------------|----------|----------|----------|
| hsa-miR-23a-3p  | 20689.96 | 14972.35 | 12344.62 |
| hsa-let-7a-5p   | 11938.04 | 8124.06  | 13613.01 |
| hsa-miR-146a-5p | 10510.75 | 12164.13 | 9982.60  |
| hsa-miR-27b-3p  | 14672.13 | 8085.89  | 8891.81  |
| hsa-miR-204-5p  | 15340.27 | 7435.40  | 7277.19  |
| hsa-miR-30d-5p  | 5132.58  | 12326.17 | 8564.36  |
| hsa-miR-25-3p   | 13450.26 | 6155.60  | 6129.90  |
| hsa-miR-148a-3p | 8354.29  | 6959.49  | 9244.74  |
| hsa-let-7d-3p   | 6515.13  | 9815.54  | 6892.39  |
| hsa-miR-22-3p   | 3580.19  | 8643.04  | 9894.80  |
| hsa-miR-15b-5p  | 4621.05  | 8649.09  | 8116.81  |
| hsa-miR-423-3p  | 4454.77  | 6535.43  | 8143.27  |
| hsa-miR-191-5p  | 5827.66  | 7074.15  | 5338.96  |
| hsa-miR-29a-3p  | 5831.22  | 7083.94  | 4605.65  |
| hsa-miR-100-5p  | 6487.67  | 5880.48  | 4422.92  |
| hsa-miR-425-5p  | 4725.28  | 6760.71  | 5268.37  |
| hsa-let-7c-5p   | 5298.85  | 4772.95  | 6529.22  |
| hsa-miR-320a-3p | 4065.28  | 8233.25  | 4122.09  |
| hsa-miR-186-5p  | 4016.47  | 7281.85  | 4393.47  |
| hsa-miR-99a-5p  | 4990.71  | 6309.86  | 3647.63  |
| hsa-miR-93-5p   | 2654.76  | 6728.16  | 5495.64  |
| hsa-miR-340-5p  | 3294.94  | 7175.55  | 3898.24  |
| hsa-miR-3613-5p | 1418.14  | 6751.49  | 5825.51  |
| hsa-miR-10a-5p  | 2619.68  | 5961.57  | 4675.09  |
| hsa-miR-26a-5p  | 2845.95  | 4359.26  | 4602.80  |
| hsa-miR-125a-5p | 3562.90  | 4977.20  | 3131.77  |
| hsa-miR-150-5p  | 3398.67  | 3884.07  | 2614.62  |
| hsa-miR-15a-5p  | 4436.47  | 2724.11  | 2389.35  |
| hsa-miR-98-5p   | 4871.22  | 2223.56  | 2362.17  |
| hsa-miR-30e-5p  | 1246.79  | 4665.49  | 3454.80  |
| hsa-miR-10b-5p  | 1773.57  | 4260.16  | 3088.50  |
| hsa-miR-335-5p  | 1936.79  | 3350.54  | 2689.19  |
| hsa-miR-142-5p  | 1146.11  | 3511.87  | 2426.63  |
| hsa-miR-221-3p  | 2740.70  | 1723.60  | 1717.80  |
| hsa-miR-30a-5p  | 730.68   | 3307.47  | 2118.68  |
| hsa-miR-342-3p  | 1601.20  | 2396.12  | 1799.91  |
| hsa-miR-203a-3p | 2190.52  | 527.62   | 3000.13  |
| hsa-miR-28-3p   | 1717.13  | 2031.27  | 1901.66  |
| hsa-miR-378a-3p | 1361.70  | 2355.65  | 1633.27  |
| hsa-miR-146b-5p | 1647.98  | 1741.31  | 1837.33  |
| hsa-miR-484     | 1101.87  | 2338.51  | 1673.11  |
| hsa-miR-185-5p  | 558.31   | 2370.77  | 2111.28  |
| hsa-miR-652-3p  | 1598.15  | 1436.23  | 1524.12  |
| hsa-let-7d-5p   | 1202.55  | 1982.44  | 1369.57  |
| hsa-miR-361-5p  | 892.89   | 2061.95  | 1368.15  |
| hsa-miR-140-5p  | 2619.17  | 742.24   | 742.85   |
| hsa-miR-99b-5p  | 2129.00  | 1199.00  | 714.95   |
| hsa-miR-199a-3p | 1661.71  | 1523.09  | 806.46   |
| hsa-miR-199b-3p | 1654.59  | 1490.83  | 812.01   |
| hsa-miR-148b-3p | 1471.03  | 1081.75  | 1351.92  |
| hsa-miR-363-3p  | 999.16   | 1423.41  | 1155.11  |
| hsa-miR-128-3p  | 1155.77  | 1246.24  | 1146.72  |
| hsa-miR-23b-3p  | 1624.59  | 929.50   | 932.97   |

|                   |         |         |         |
|-------------------|---------|---------|---------|
| hsa-miR-424-5p    | 894.41  | 1425.86 | 921.58  |
| hsa-miR-197-3p    | 1001.70 | 1453.95 | 698.30  |
| hsa-miR-106b-3p   | 865.94  | 1377.03 | 903.51  |
| hsa-miR-450b-5p   | 652.38  | 1543.11 | 949.48  |
| hsa-miR-193a-5p   | 980.35  | 1331.66 | 753.66  |
| hsa-miR-3529-3p   | 1644.42 | 718.19  | 653.48  |
| hsa-miR-30c-5p    | 1249.33 | 959.17  | 733.74  |
| hsa-miR-501-3p    | 504.92  | 1320.28 | 951.04  |
| hsa-miR-28-5p     | 1299.16 | 845.52  | 562.12  |
| hsa-miR-542-3p    | 496.27  | 1073.83 | 993.59  |
| hsa-miR-1301-3p   | 1697.30 | 538.86  | 220.72  |
| hsa-miR-222-3p    | 752.04  | 890.89  | 698.45  |
| hsa-miR-345-5p    | 743.39  | 759.82  | 795.07  |
| hsa-let-7e-5p     | 698.14  | 658.41  | 742.70  |
| hsa-miR-142-3p    | 520.68  | 801.01  | 738.29  |
| hsa-miR-122-5p    | 1298.14 | 254.23  | 505.19  |
| hsa-miR-21-3p     | 895.94  | 505.01  | 553.01  |
| hsa-miR-206       | 820.17  | 571.12  | 556.28  |
| hsa-miR-338-5p    | 791.19  | 609.44  | 520.85  |
| hsa-miR-126-3p    | 811.53  | 550.09  | 536.93  |
| hsa-miR-92b-3p    | 481.53  | 664.89  | 675.25  |
| hsa-miR-361-3p    | 375.26  | 871.59  | 506.47  |
| hsa-miR-19b-3p    | 132.20  | 831.69  | 780.13  |
| hsa-miR-574-3p    | 305.60  | 879.66  | 524.69  |
| hsa-miR-32-5p     | 280.68  | 664.61  | 751.10  |
| hsa-miR-320b      | 432.21  | 356.07  | 785.25  |
| hsa-miR-223-5p    | 723.06  | 443.50  | 395.47  |
| hsa-miR-30e-3p    | 567.46  | 441.77  | 528.25  |
| hsa-miR-199b-5p   | 806.45  | 400.72  | 292.44  |
| hsa-miR-34c-5p    | 726.61  | 532.95  | 234.81  |
| hsa-miR-106b-5p   | 252.21  | 667.77  | 515.72  |
| hsa-miR-144-3p    | 502.38  | 620.53  | 255.30  |
| hsa-miR-500a-3p   | 227.29  | 525.17  | 601.25  |
| hsa-miR-629-5p    | 357.97  | 361.98  | 629.28  |
| hsa-miR-421       | 418.99  | 390.21  | 528.82  |
| hsa-miR-1298-5p   | 136.27  | 796.69  | 394.19  |
| hsa-miR-424-3p    | 147.46  | 591.86  | 529.24  |
| hsa-miR-502-3p    | 259.32  | 594.17  | 325.88  |
| hsa-miR-532-5p    | 312.71  | 581.35  | 278.50  |
| hsa-miR-140-3p    | 187.12  | 603.53  | 320.62  |
| hsa-miR-181a-2-3p | 492.72  | 357.51  | 219.58  |
| hsa-miR-486-3p    | 563.39  | 293.70  | 187.42  |
| hsa-miR-203b-5p   | 15.25   | 13.54   | 1003.41 |
| hsa-miR-155-5p    | 348.31  | 366.87  | 256.87  |
| hsa-miR-3184-5p   | 555.26  | 155.28  | 222.00  |
| hsa-miR-483-5p    | 38.64   | 483.11  | 377.54  |
| hsa-miR-199a-5p   | 514.07  | 222.69  | 162.09  |
| hsa-miR-182-5p    | 402.21  | 169.39  | 311.23  |
| hsa-miR-150-3p    | 230.34  | 193.74  | 416.82  |
| hsa-miR-339-3p    | 270.51  | 211.02  | 356.77  |
| hsa-miR-145-3p    | 451.53  | 236.80  | 138.61  |
| hsa-miR-20a-5p    | 326.44  | 205.98  | 287.03  |
| hsa-miR-29c-3p    | 238.98  | 284.19  | 266.83  |

|                   |        |        |        |
|-------------------|--------|--------|--------|
| hsa-miR-17-5p     | 399.16 | 280.88 | 95.20  |
| hsa-miR-26b-5p    | 60.00  | 363.27 | 349.51 |
| hsa-miR-769-5p    | 148.48 | 467.70 | 155.54 |
| hsa-miR-582-3p    | 126.10 | 437.74 | 207.06 |
| hsa-miR-499a-5p   | 156.61 | 256.83 | 348.80 |
| hsa-miR-132-3p    | 269.49 | 261.72 | 226.98 |
| hsa-miR-503-5p    | 175.42 | 340.95 | 226.41 |
| hsa-miR-328-3p    | 186.61 | 373.21 | 147.43 |
| hsa-miR-15b-3p    | 372.21 | 163.05 | 131.21 |
| hsa-miR-145-5p    | 68.14  | 342.24 | 254.30 |
| hsa-miR-744-5p    | 227.80 | 252.22 | 184.43 |
| hsa-miR-196a-5p   | 170.85 | 116.53 | 373.70 |
| hsa-miR-375-3p    | 240.51 | 200.65 | 202.50 |
| hsa-miR-195-5p    | 489.16 | 50.27  | 54.08  |
| hsa-miR-130b-3p   | 228.82 | 192.01 | 165.93 |
| hsa-miR-342-5p    | 208.48 | 167.95 | 191.55 |
| hsa-miR-339-5p    | 335.60 | 149.37 | 81.54  |
| hsa-miR-3615      | 175.93 | 158.45 | 217.02 |
| hsa-miR-374b-5p   | 160.17 | 218.94 | 168.78 |
| hsa-miR-374c-3p   | 160.17 | 218.94 | 168.78 |
| hsa-miR-183-5p    | 228.31 | 150.67 | 165.22 |
| hsa-miR-1911-5p   | 167.29 | 159.02 | 191.12 |
| hsa-miR-19a-3p    | 54.92  | 244.15 | 216.31 |
| hsa-miR-505-3p    | 87.46  | 326.11 | 85.53  |
| hsa-miR-18a-5p    | 213.56 | 170.83 | 112.00 |
| hsa-miR-30a-3p    | 140.34 | 243.29 | 104.45 |
| hsa-miR-2110      | 220.68 | 96.65  | 169.49 |
| hsa-miR-374a-5p   | 212.04 | 78.21  | 193.40 |
| hsa-miR-22-5p     | 100.17 | 185.67 | 196.81 |
| hsa-miR-532-3p    | 267.97 | 127.62 | 81.40  |
| hsa-miR-369-3p    | 104.24 | 262.30 | 107.30 |
| hsa-miR-130b-5p   | 105.76 | 188.55 | 164.93 |
| hsa-miR-618       | 175.42 | 216.93 | 55.93  |
| hsa-miR-450a-5p   | 69.15  | 223.26 | 151.70 |
| hsa-miR-16-2-3p   | 108.81 | 181.20 | 153.12 |
| hsa-miR-379-5p    | 69.66  | 165.79 | 166.50 |
| hsa-miR-30b-5p    | 213.05 | 157.29 | 31.45  |
| hsa-miR-382-5p    | 111.36 | 145.34 | 133.91 |
| hsa-miR-497-5p    | 173.39 | 107.02 | 63.33  |
| hsa-miR-192-5p    | 163.22 | 118.40 | 58.63  |
| hsa-miR-152-3p    | 109.32 | 166.37 | 58.49  |
| hsa-miR-204-3p    | 43.73  | 178.32 | 100.90 |
| hsa-miR-320c      | 107.29 | 90.60  | 124.95 |
| hsa-miR-3614-5p   | 194.24 | 97.66  | 29.32  |
| hsa-miR-200c-3p   | 47.80  | 121.71 | 147.15 |
| hsa-miR-194-5p    | 212.54 | 96.51  | 6.12   |
| hsa-miR-205-5p    | 160.17 | 71.59  | 79.55  |
| hsa-miR-598-3p    | 129.66 | 52.72  | 115.13 |
| hsa-miR-651-5p    | 111.36 | 62.37  | 104.88 |
| hsa-miR-340-3p    | 74.75  | 99.39  | 102.60 |
| hsa-miR-378a-5p   | 132.71 | 50.99  | 76.56  |
| hsa-miR-450a-1-3p | 117.97 | 25.78  | 114.56 |
| hsa-miR-548e-3p   | 9.66   | 170.11 | 73.72  |



|                   |        |        |        |
|-------------------|--------|--------|--------|
| hsa-miR-181a-3p   | 138.81 | 81.96  | 31.31  |
| hsa-miR-335-3p    | 133.22 | 50.70  | 67.74  |
| hsa-miR-664a-5p   | 17.29  | 106.73 | 124.38 |
| hsa-miR-625-5p    | 169.83 | 36.73  | 38.42  |
| hsa-miR-450a-2-3p | 71.19  | 99.53  | 72.58  |
| hsa-miR-23a-5p    | 33.05  | 78.21  | 119.11 |
| hsa-miR-582-5p    | 69.15  | 44.65  | 110.72 |
| hsa-miR-191-3p    | 146.44 | 53.73  | 12.38  |
| hsa-miR-1912-3p   | 26.95  | 106.16 | 55.64  |
| hsa-miR-576-5p    | 52.88  | 67.41  | 59.20  |
| hsa-miR-323a-3p   | 42.71  | 33.42  | 91.65  |
| hsa-miR-942-5p    | 60.00  | 21.32  | 85.67  |
| hsa-miR-181c-5p   | 62.54  | 63.38  | 38.42  |
| hsa-miR-493-5p    | 61.02  | 46.67  | 49.38  |
| hsa-miR-200a-3p   | 19.83  | 35.00  | 97.20  |
| hsa-miR-1270      | 67.12  | 59.06  | 21.77  |
| hsa-miR-29b-3p    | 80.34  | 37.02  | 29.03  |
| hsa-miR-9985      | 40.68  | 63.23  | 40.13  |
| hsa-miR-574-5p    | 30.51  | 64.53  | 41.41  |
| hsa-miR-425-3p    | 46.27  | 51.13  | 38.57  |
| hsa-miR-139-5p    | 49.83  | 36.30  | 12.95  |
| hsa-miR-873-5p    | 60.00  | 9.22   | 29.03  |
| hsa-miR-129-5p    | 16.78  | 38.89  | 35.86  |
| hsa-miR-146b-3p   | 28.47  | 4.03   | 52.94  |
| hsa-miR-12136     | 8.64   | 42.49  | 27.61  |
| hsa-miR-329-3p    | 32.03  | 31.98  | 3.42   |
| hsa-miR-10b-3p    | 16.78  | 30.10  | 16.79  |
| hsa-miR-365b-3p   | 17.80  | 28.23  | 5.83   |
| hsa-miR-365a-3p   | 19.32  | 24.49  | 6.12   |
| hsa-miR-664a-3p   | 18.31  | 21.89  | 9.39   |
| hsa-miR-941       | 11.69  | 9.65   | 3.42   |

**Table S3.** The complete list of the miRNAs isolated by each method. Abbreviations: mirVana PARIS Kit from Ambion (PAR), Total Exosome Isolation Reagent from Invitrogen (INV), Plasma/Serum RNA Purification Kit from Norgen (NOR), and the fractions 3 (F03) and 9 (F09) of the SEC.

| Methods             | Common miRNAs | miRNAs                                                                                                                                                                                                                                                                                                                                                                                                                                                                                                                                                                                                                                                                                                                                                                                                                                                                                                                                                                                                                                                                                                                                                  |
|---------------------|---------------|---------------------------------------------------------------------------------------------------------------------------------------------------------------------------------------------------------------------------------------------------------------------------------------------------------------------------------------------------------------------------------------------------------------------------------------------------------------------------------------------------------------------------------------------------------------------------------------------------------------------------------------------------------------------------------------------------------------------------------------------------------------------------------------------------------------------------------------------------------------------------------------------------------------------------------------------------------------------------------------------------------------------------------------------------------------------------------------------------------------------------------------------------------|
| F03 F09 INV NOR PAR | 48            | hsa-miR-30d-5p hsa-let-7i-5p hsa-miR-23b-3p hsa-miR-23a-3p hsa-miR-143-3p hsa-miR-125a-5p hsa-miR-10b-5p hsa-miR-423-3p hsa-miR-146a-5p hsa-miR-10a-5p hsa-miR-99a-5p hsa-miR-146b-5p hsa-miR-24-3p hsa-miR-15b-5p hsa-miR-223-3p hsa-miR-451a hsa-miR-150-5p hsa-miR-199b-5p hsa-let-7b-5p hsa-let-7f-5p hsa-miR-335-5p hsa-miR-26a-5p hsa-miR-186-5p hsa-miR-93-5p hsa-let-7a-5p hsa-miR-92a-3p hsa-let-7c-5p hsa-miR-203a-3p hsa-miR-340-5p hsa-miR-148a-3p hsa-miR-25-3p hsa-miR-204-5p hsa-miR-423-5p hsa-miR-425-5p hsa-miR-98-5p hsa-miR-3184-3p hsa-miR-29a-3p hsa-let-7g-5p hsa-miR-27b-3p hsa-miR-21-5p hsa-let-7d-3p hsa-miR-3529-3p hsa-miR-100-5p hsa-miR-22-3p hsa-miR-16-5p hsa-miR-320a-3p hsa-miR-27a-3p hsa-miR-191-5p                                                                                                                                                                                                                                                                                                                                                                                                                |
| F03 INV NOR PAR     | 12            | hsa-miR-92b-3p hsa-miR-99b-5p hsa-let-7e-5p hsa-miR-199a-3p hsa-miR-30c-5p hsa-miR-30a-5p hsa-miR-199b-3p hsa-miR-122-5p hsa-miR-183-5p hsa-miR-15a-5p hsa-miR-1911-5p hsa-miR-142-3p                                                                                                                                                                                                                                                                                                                                                                                                                                                                                                                                                                                                                                                                                                                                                                                                                                                                                                                                                                   |
| F09 INV NOR PAR     | 18            | hsa-miR-185-5p hsa-miR-652-3p hsa-miR-3613-5p hsa-miR-193a-5p hsa-miR-28-3p hsa-miR-378a-3p hsa-miR-142-5p hsa-miR-28-5p hsa-miR-128-3p hsa-miR-345-5p hsa-miR-19b-3p hsa-miR-199a-5p hsa-let-7d-5p hsa-miR-30e-5p hsa-miR-320b hsa-miR-197-3p hsa-miR-3184-5p hsa-miR-222-3p                                                                                                                                                                                                                                                                                                                                                                                                                                                                                                                                                                                                                                                                                                                                                                                                                                                                           |
| INV NOR PAR         | 74            | hsa-miR-140-5p hsa-miR-361-5p hsa-miR-1298-5p hsa-miR-502-3p hsa-miR-30e-3p hsa-miR-34c-5p hsa-miR-221-3p hsa-miR-375-3p hsa-miR-17-5p hsa-miR-542-3p hsa-miR-181a-2-3p hsa-miR-335-3p hsa-miR-450a-5p hsa-miR-18a-5p hsa-miR-2110 hsa-miR-374a-5p hsa-miR-450b-5p hsa-miR-744-5p hsa-miR-196a-5p hsa-miR-150-3p hsa-miR-424-5p hsa-miR-363-3p hsa-miR-30b-5p hsa-miR-320c hsa-miR-424-3p hsa-miR-629-5p hsa-miR-340-3p hsa-miR-126-3p hsa-miR-361-3p hsa-miR-146b-3p hsa-miR-182-5p hsa-miR-769-5p hsa-miR-19a-3p hsa-miR-15b-3p hsa-miR-1301-3p hsa-miR-574-3p hsa-miR-145-3p hsa-miR-342-3p hsa-miR-29c-3p hsa-miR-483-5p hsa-miR-181a-3p hsa-miR-144-3p hsa-miR-499a-5p hsa-miR-16-2-3p hsa-miR-339-3p hsa-miR-576-5p hsa-miR-338-5p hsa-miR-130b-5p hsa-miR-618 hsa-miR-130b-3p hsa-miR-421 hsa-miR-206 hsa-miR-382-5p hsa-miR-582-3p hsa-miR-106b-3p hsa-miR-501-3p hsa-miR-574-5p hsa-miR-548e-3p hsa-miR-223-5p hsa-miR-140-3p hsa-miR-505-3p hsa-miR-484 hsa-miR-26b-5p hsa-miR-132-3p hsa-miR-155-5p hsa-miR-532-5p hsa-miR-378a-5p hsa-miR-145-5p hsa-miR-20a-5p hsa-miR-21-3p hsa-miR-148b-3p hsa-miR-500a-3p hsa-miR-503-5p hsa-miR-328-3p |
| F09 INV NOR         | 1             | hsa-miR-203b-5p                                                                                                                                                                                                                                                                                                                                                                                                                                                                                                                                                                                                                                                                                                                                                                                                                                                                                                                                                                                                                                                                                                                                         |
| INV PAR             | 6             | hsa-miR-3614-5p hsa-miR-425-3p hsa-miR-205-5p hsa-miR-339-5p hsa-miR-9985 hsa-miR-204-3p                                                                                                                                                                                                                                                                                                                                                                                                                                                                                                                                                                                                                                                                                                                                                                                                                                                                                                                                                                                                                                                                |
| NOR PAR             | 5             | hsa-miR-27a-5p hsa-miR-3173-5p hsa-miR-4443 hsa-miR-625-3p hsa-miR-495-3p                                                                                                                                                                                                                                                                                                                                                                                                                                                                                                                                                                                                                                                                                                                                                                                                                                                                                                                                                                                                                                                                               |

|         |    |                                                                                                                                                                                                                                                                                                                                                                                                                                                                                                                                                                                                                                                                                                            |
|---------|----|------------------------------------------------------------------------------------------------------------------------------------------------------------------------------------------------------------------------------------------------------------------------------------------------------------------------------------------------------------------------------------------------------------------------------------------------------------------------------------------------------------------------------------------------------------------------------------------------------------------------------------------------------------------------------------------------------------|
| INV NOR | 45 | hsa-miR-3615 hsa-miR-873-5p hsa-miR-374b-5p hsa-miR-450a-2-3p hsa-miR-1270 hsa-miR-195-5p hsa-miR-1912-3p hsa-miR-532-3p hsa-miR-497-5p hsa-miR-194-5p hsa-miR-651-5p hsa-miR-493-5p hsa-miR-598-3p hsa-miR-22-5p hsa-miR-139-5p hsa-miR-486-3p hsa-miR-941 hsa-miR-323a-3p hsa-miR-129-5p hsa-miR-342-5p hsa-miR-191-3p hsa-miR-450a-1-3p hsa-miR-32-5p hsa-miR-23a-5p hsa-miR-329-3p hsa-miR-664a-5p hsa-miR-374c-3p hsa-miR-582-5p hsa-miR-192-5p hsa-miR-10b-3p hsa-miR-29b-3p hsa-miR-200c-3p hsa-miR-12136 hsa-miR-30a-3p hsa-miR-942-5p hsa-miR-181c-5p hsa-miR-200a-3p hsa-miR-106b-5p hsa-miR-379-5p hsa-miR-625-5p hsa-miR-369-3p hsa-miR-365b-3p hsa-miR-664a-3p hsa-miR-365a-3p hsa-miR-152-3p |
| PAR     | 7  | hsa-miR-576-3p hsa-miR-1262 hsa-miR-3613-3p hsa-miR-1307-3p hsa-miR-4516 hsa-miR-338-3p hsa-miR-1273h-3p                                                                                                                                                                                                                                                                                                                                                                                                                                                                                                                                                                                                   |
| INV     | 30 | hsa-miR-656-3p hsa-miR-654-3p hsa-miR-98-3p hsa-miR-1306-5p hsa-miR-7-1-3p hsa-miR-483-3p hsa-miR-25-5p hsa-miR-6842-3p hsa-miR-548a-3p hsa-miR-487b-3p hsa-miR-877-5p hsa-miR-3679-5p hsa-miR-224-5p hsa-miR-550a-5p hsa-miR-369-5p hsa-miR-615-3p hsa-miR-485-5p hsa-miR-660-5p hsa-miR-324-3p hsa-miR-3065-5p hsa-miR-323b-3p hsa-miR-362-5p hsa-miR-432-5p hsa-miR-130a-3p hsa-miR-590-3p hsa-miR-1180-3p hsa-miR-214-5p hsa-miR-433-3p hsa-miR-34c-3p hsa-miR-3177-3p                                                                                                                                                                                                                                 |
| NOR     | 35 | hsa-miR-149-5p hsa-miR-381-3p hsa-miR-30c-1-3p hsa-miR-589-5p hsa-miR-216b-5p hsa-miR-1226-3p hsa-miR-127-3p hsa-miR-324-5p hsa-miR-1294 hsa-miR-7705 hsa-miR-3182 hsa-miR-26a-2-3p hsa-miR-126-5p hsa-miR-4742-3p hsa-miR-494-3p hsa-miR-181d-5p hsa-miR-766-3p hsa-miR-616-5p hsa-miR-10a-3p hsa-let-7i-3p hsa-miR-1284 hsa-miR-196b-5p hsa-miR-584-5p hsa-miR-32-3p hsa-miR-18a-3p hsa-miR-200b-3p hsa-miR-337-3p hsa-miR-874-3p hsa-miR-331-3p hsa-miR-20b-5p hsa-miR-409-3p hsa-miR-1249-3p hsa-miR-29b-1-5p hsa-miR-95-3p hsa-miR-511-5p                                                                                                                                                             |
| F03     | 0  |                                                                                                                                                                                                                                                                                                                                                                                                                                                                                                                                                                                                                                                                                                            |
| F09     | 0  |                                                                                                                                                                                                                                                                                                                                                                                                                                                                                                                                                                                                                                                                                                            |

**Table S4.** The complete list of the pathways predicted by ConsensusPathDB considering the 9,952 target genes of the 281 miRNAs detected in our study by smallRNAseq.

| Pathway name                                                                    | Set size | Candidates contained | p-value  | q-value  | Pathway source |
|---------------------------------------------------------------------------------|----------|----------------------|----------|----------|----------------|
| Axon guidance                                                                   | 358      | 276 (77.1%)          | 2.83e-23 | 6.48e-20 | Reactome       |
| Membrane Trafficking                                                            | 582      | 414 (71.1%)          | 5.05e-22 | 5.78e-19 | Reactome       |
| Vesicle-mediated transport                                                      | 620      | 434 (70.0%)          | 7.36e-21 | 5.62e-18 | Reactome       |
| Endocytosis - Homo sapiens (human)                                              | 244      | 189 (77.5%)          | 1.06e-16 | 6.06e-14 | KEGG           |
| Axon guidance - Homo sapiens (human)                                            | 175      | 143 (81.7%)          | 1.46e-16 | 6.7e-14  | KEGG           |
| Pathways in cancer - Homo sapiens (human)                                       | 526      | 362 (68.8%)          | 9.5e-16  | 3.63e-13 | KEGG           |
| Developmental Biology                                                           | 620      | 418 (67.4%)          | 1.12e-15 | 3.67e-13 | Reactome       |
| Signaling by Receptor Tyrosine Kinases                                          | 423      | 299 (70.7%)          | 1.37e-15 | 3.92e-13 | Reactome       |
| Proteoglycans in cancer - Homo sapiens (human)                                  | 201      | 154 (76.6%)          | 3.81e-13 | 8.9e-11  | KEGG           |
| Disease                                                                         | 510      | 344 (67.5%)          | 3.88e-13 | 8.9e-11  | Reactome       |
| MAPK signaling pathway - Homo sapiens (human)                                   | 295      | 213 (72.2%)          | 6.11e-13 | 1.27e-10 | KEGG           |
| Intracellular signaling by second messengers                                    | 245      | 177 (72.2%)          | 5.14e-11 | 9.76e-09 | Reactome       |
| Neuronal System                                                                 | 368      | 252 (68.5%)          | 5.54e-11 | 9.76e-09 | Reactome       |
| Protein-protein interactions at synapses                                        | 88       | 74 (84.1%)           | 2.35e-10 | 3.84e-08 | Reactome       |
| Diseases of signal transduction                                                 | 248      | 177 (71.4%)          | 2.64e-10 | 4.03e-08 | Reactome       |
| Cellular senescence - Homo sapiens (human)                                      | 160      | 121 (75.6%)          | 5.52e-10 | 7.9e-08  | KEGG           |
| Hippo signaling pathway - Homo sapiens (human)                                  | 154      | 117 (76.0%)          | 6.49e-10 | 8.75e-08 | KEGG           |
| Signaling pathways regulating pluripotency of stem cells - Homo sapiens (human) | 139      | 106 (76.3%)          | 2.85e-09 | 3.63e-07 | KEGG           |
| Adherens junction - Homo sapiens (human)                                        | 72       | 61 (84.7%)           | 5.03e-09 | 6.07e-07 | KEGG           |
| Insulin signaling pathway - Homo sapiens (human)                                | 137      | 104 (75.9%)          | 6.24e-09 | 7.15e-07 | KEGG           |
| PIP3 activates AKT signaling                                                    | 214      | 152 (71.0%)          | 8.26e-09 | 9.01e-07 | Reactome       |
| Bacterial invasion of epithelial cells - Homo sapiens (human)                   | 74       | 62 (83.8%)           | 9.28e-09 | 9.41e-07 | KEGG           |
| Breast cancer - Homo sapiens (human)                                            | 147      | 110 (74.8%)          | 9.44e-09 | 9.41e-07 | KEGG           |
| Thyroid hormone signaling pathway - Homo sapiens (human)                        | 116      | 90 (77.6%)           | 1,00E-08 | 9.57e-07 | KEGG           |
| Wnt signaling pathway - Homo sapiens (human)                                    | 149      | 111 (74.5%)          | 1.24e-08 | 1.14e-06 | KEGG           |
| Intra-Golgi and retrograde Golgi-to-ER traffic                                  | 186      | 134 (72.0%)          | 1.51e-08 | 1.33e-06 | Reactome       |

|                                                                            |     |             |          |          |          |
|----------------------------------------------------------------------------|-----|-------------|----------|----------|----------|
| Signaling by TGF-beta family members                                       | 96  | 76 (79.2%)  | 2.94e-08 | 2.49e-06 | Reactome |
| cAMP signaling pathway - Homo sapiens (human)                              | 199 | 141 (70.9%) | 3.66e-08 | 2.89e-06 | KEGG     |
| Focal adhesion - Homo sapiens (human)                                      | 199 | 141 (70.9%) | 3.66e-08 | 2.89e-06 | KEGG     |
| Human papillomavirus infection - Homo sapiens (human)                      | 339 | 225 (66.4%) | 3.98e-08 | 3.02e-06 | KEGG     |
| Ras signaling pathway - Homo sapiens (human)                               | 232 | 161 (69.4%) | 4.09e-08 | 3.02e-06 | KEGG     |
| FoxO signaling pathway - Homo sapiens (human)                              | 132 | 99 (75.0%)  | 4.24e-08 | 3.04e-06 | KEGG     |
| Regulation of actin cytoskeleton - Homo sapiens (human)                    | 213 | 149 (70.0%) | 5.79e-08 | 4.02e-06 | KEGG     |
| Signaling by VEGF                                                          | 100 | 78 (78.0%)  | 6.38e-08 | 4.3e-06  | Reactome |
| MAPK family signaling cascades                                             | 237 | 163 (68.8%) | 8.82e-08 | 5.78e-06 | Reactome |
| Clathrin-mediated endocytosis                                              | 138 | 102 (73.9%) | 9.56e-08 | 6,00E-06 | Reactome |
| Phospholipase D signaling pathway - Homo sapiens (human)                   | 146 | 107 (73.3%) | 9.87e-08 | 6,00E-06 | KEGG     |
| Cushing syndrome - Homo sapiens (human)                                    | 154 | 112 (72.7%) | 9.94e-08 | 6,00E-06 | KEGG     |
| Rap1 signaling pathway - Homo sapiens (human)                              | 206 | 144 (69.9%) | 1.03e-07 | 6.08e-06 | KEGG     |
| Insulin resistance - Homo sapiens (human)                                  | 107 | 82 (76.6%)  | 1.21e-07 | 6.92e-06 | KEGG     |
| Melanogenesis - Homo sapiens (human)                                       | 101 | 78 (77.2%)  | 1.38e-07 | 7.69e-06 | KEGG     |
| cGMP-PKG signaling pathway - Homo sapiens (human)                          | 163 | 117 (71.8%) | 1.7e-07  | 9.24e-06 | KEGG     |
| EPH-Ephrin signaling                                                       | 74  | 60 (81.1%)  | 1.75e-07 | 9.24e-06 | Reactome |
| Netrin-1 signaling                                                         | 41  | 37 (90.2%)  | 1.8e-07  | 9.24e-06 | Reactome |
| Extracellular matrix organization                                          | 294 | 196 (66.7%) | 1.81e-07 | 9.24e-06 | Reactome |
| L1CAM interactions                                                         | 103 | 79 (76.7%)  | 1.93e-07 | 9.62e-06 | Reactome |
| Rho GTPase cycle                                                           | 144 | 105 (72.9%) | 2,00E-07 | 9.74e-06 | Reactome |
| Gastric cancer - Homo sapiens (human)                                      | 149 | 108 (72.5%) | 2.23e-07 | 1.05e-05 | KEGG     |
| Death Receptor Signalling                                                  | 141 | 103 (73.0%) | 2.24e-07 | 1.05e-05 | Reactome |
| Signaling by TGF-beta Receptor Complex                                     | 67  | 55 (82.1%)  | 2.6e-07  | 1.19e-05 | Reactome |
| Chronic myeloid leukemia - Homo sapiens (human)                            | 76  | 61 (80.3%)  | 2.78e-07 | 1.25e-05 | KEGG     |
| Phosphatidylinositol signaling system - Homo sapiens (human)               | 99  | 76 (76.8%)  | 3.08e-07 | 1.36e-05 | KEGG     |
| VEGFA-VEGFR2 Pathway                                                       | 92  | 71 (77.2%)  | 5.26e-07 | 2.27e-05 | Reactome |
| Parathyroid hormone synthesis, secretion and action - Homo sapiens (human) | 106 | 80 (75.5%)  | 5.34e-07 | 2.27e-05 | KEGG     |
| Signaling by NTRKs                                                         | 89  | 69 (77.5%)  | 5.58e-07 | 2.33e-05 | Reactome |
| Colorectal cancer - Homo sapiens (human)                                   | 86  | 67 (77.9%)  | 5.88e-07 | 2.41e-05 | KEGG     |
| Transport of small molecules                                               | 666 | 407 (61.1%) | 7.3e-07  | 2.93e-05 | Reactome |

|                                                                                  |     |             |          |          |          |
|----------------------------------------------------------------------------------|-----|-------------|----------|----------|----------|
| Antigen processing: Ubiquitination & Proteasome degradation                      | 264 | 176 (66.7%) | 7.6e-07  | 3.00E-05 | Reactome |
| ErbB signaling pathway - Homo sapiens (human)                                    | 85  | 66 (77.6%)  | 8.9e-07  | 3.46e-05 | KEGG     |
| AGE-RAGE signaling pathway in diabetic complications - Homo sapiens (human)      | 99  | 75 (75.8%)  | 9.32e-07 | 3.56e-05 | KEGG     |
| Signaling by PDGF                                                                | 54  | 45 (83.3%)  | 1.43e-06 | 5.39e-05 | Reactome |
| mapkinase signaling pathway                                                      | 57  | 47 (82.5%)  | 1.53e-06 | 5.58e-05 | BioCarta |
| Neurexins and neuroligins                                                        | 57  | 47 (82.5%)  | 1.53e-06 | 5.58e-05 | Reactome |
| Glioma - Homo sapiens (human)                                                    | 71  | 56 (78.9%)  | 2.46e-06 | 8.81e-05 | KEGG     |
| NCAM signaling for neurite out-growth                                            | 59  | 48 (81.4%)  | 2.54e-06 | 8.93e-05 | Reactome |
| Regulation of PTEN gene transcription                                            | 62  | 50 (80.6%)  | 2.57e-06 | 8.93e-05 | Reactome |
| Choline metabolism in cancer - Homo sapiens (human)                              | 99  | 74 (74.7%)  | 2.67e-06 | 9.14e-05 | KEGG     |
| PTEN Regulation                                                                  | 96  | 72 (75.0%)  | 2.94e-06 | 9.92e-05 | Reactome |
| AMPK signaling pathway - Homo sapiens (human)                                    | 120 | 87 (72.5%)  | 3.25e-06 | 0.000108 | KEGG     |
| PI3K-Akt signaling pathway - Homo sapiens (human)                                | 354 | 226 (63.8%) | 3.37e-06 | 0.00011  | KEGG     |
| Signaling by NTRK1 (TRKA)                                                        | 76  | 59 (77.6%)  | 3.42e-06 | 0.00011  | Reactome |
| Translocation of GLUT4 to the plasma membrane                                    | 32  | 29 (90.6%)  | 3.47e-06 | 0.00011  | Reactome |
| Ephrin signaling                                                                 | 19  | 19 (100.0%) | 3.96e-06 | 0.000124 | Reactome |
| Class I MHC mediated antigen processing & presentation                           | 324 | 208 (64.2%) | 4.73e-06 | 0.000146 | Reactome |
| Metabolism of carbohydrates                                                      | 264 | 173 (65.5%) | 4.82e-06 | 0.000147 | Reactome |
| HIF-1 signaling pathway - Homo sapiens (human)                                   | 100 | 74 (74.0%)  | 5.06e-06 | 0.000153 | KEGG     |
| G alpha (12/13) signalling events                                                | 89  | 67 (75.3%)  | 5.18e-06 | 0.000154 | Reactome |
| Oxytocin signaling pathway - Homo sapiens (human)                                | 152 | 106 (69.7%) | 5.79e-06 | 0.00017  | KEGG     |
| Transmission across Chemical Synapses                                            | 224 | 149 (66.5%) | 6.34e-06 | 0.000181 | Reactome |
| Hepatitis B - Homo sapiens (human)                                               | 144 | 101 (70.1%) | 6.39e-06 | 0.000181 | KEGG     |
| Adrenergic signaling in cardiomyocytes - Homo sapiens (human)                    | 144 | 101 (70.1%) | 6.39e-06 | 0.000181 | KEGG     |
| p75 NTR receptor-mediated signalling                                             | 99  | 73 (73.7%)  | 7.28e-06 | 0.000203 | Reactome |
| Autophagy - animal - Homo sapiens (human)                                        | 128 | 91 (71.1%)  | 7.51e-06 | 0.000207 | KEGG     |
| TGF-beta signaling pathway - Homo sapiens (human)                                | 85  | 64 (75.3%)  | 8.33e-06 | 0.000227 | KEGG     |
| MAPK1/MAPK3 signaling                                                            | 203 | 136 (67.0%) | 9.07e-06 | 0.000241 | Reactome |
| Endocrine and other factor-regulated calcium reabsorption - Homo sapiens (human) | 47  | 39 (83.0%)  | 9.08e-06 | 0.000241 | KEGG     |
| Central carbon metabolism in cancer - Homo sapiens (human)                       | 65  | 51 (78.5%)  | 9.15e-06 | 0.000241 | KEGG     |
| Transport to the Golgi and subsequent modification                               | 168 | 115 (68.5%) | 9.62e-06 | 0.000248 | Reactome |

|                                                                      |      |             |          |          |          |
|----------------------------------------------------------------------|------|-------------|----------|----------|----------|
| keratinocyte differentiation                                         | 53   | 43 (81.1%)  | 9.8e-06  | 0.000248 | BioCarta |
| Synthesis of PIPs at the plasma membrane                             | 53   | 43 (81.1%)  | 9.8e-06  | 0.000248 | Reactome |
| Golgi Associated Vesicle Biogenesis                                  | 56   | 45 (80.4%)  | 9.85e-06 | 0.000248 | Reactome |
| Activation of BH3-only proteins                                      | 30   | 27 (90.0%)  | 1.06e-05 | 0.000262 | Reactome |
| mcalpain and friends in cell motility                                | 30   | 27 (90.0%)  | 1.06e-05 | 0.000262 | BioCarta |
| Neurotrophin signaling pathway - Homo sapiens (human)                | 119  | 85 (71.4%)  | 1.11e-05 | 0.000267 | KEGG     |
| Glycosaminoglycan metabolism                                         | 119  | 85 (71.4%)  | 1.11e-05 | 0.000267 | Reactome |
| Apelin signaling pathway - Homo sapiens (human)                      | 137  | 96 (70.1%)  | 1.15e-05 | 0.000274 | KEGG     |
| Glycogen metabolism                                                  | 22   | 21 (95.5%)  | 1.19e-05 | 0.00028  | Reactome |
| RAF/MAP kinase cascade                                               | 197  | 132 (67.0%) | 1.21e-05 | 0.000283 | Reactome |
| Golgi-to-ER retrograde transport                                     | 116  | 83 (71.6%)  | 1.26e-05 | 0.000292 | Reactome |
| Signaling by EGFR                                                    | 43   | 36 (83.7%)  | 1.36e-05 | 0.000313 | Reactome |
| Semaphorin interactions                                              | 64   | 50 (78.1%)  | 1.39e-05 | 0.000317 | Reactome |
| role of egf receptor transactivation by gpcrs in cardiac hypertrophy | 33   | 29 (87.9%)  | 1.43e-05 | 0.000322 | BioCarta |
| Prostate cancer - Homo sapiens (human)                               | 97   | 71 (73.2%)  | 1.49e-05 | 0.000332 | KEGG     |
| Endometrial cancer - Homo sapiens (human)                            | 58   | 46 (79.3%)  | 1.51e-05 | 0.000332 | KEGG     |
| Pancreatic cancer - Homo sapiens (human)                             | 75   | 57 (76.0%)  | 1.59e-05 | 0.000348 | KEGG     |
| TNF signaling pathway - Homo sapiens (human)                         | 110  | 79 (71.8%)  | 1.62e-05 | 0.000351 | KEGG     |
| mTOR signaling pathway - Homo sapiens (human)                        | 151  | 104 (68.9%) | 1.68e-05 | 0.000359 | KEGG     |
| Clathrin derived vesicle budding                                     | 72   | 55 (76.4%)  | 1.73e-05 | 0.000363 | Reactome |
| trans-Golgi Network Vesicle Budding                                  | 72   | 55 (76.4%)  | 1.73e-05 | 0.000363 | Reactome |
| Transcriptional Regulation by TP53                                   | 374  | 234 (62.6%) | 1.86e-05 | 0.000388 | Reactome |
| Cargo recognition for clathrin-mediated endocytosis                  | 99   | 72 (72.7%)  | 1.88e-05 | 0.000389 | Reactome |
| C-type lectin receptor signaling pathway - Homo sapiens (human)      | 104  | 75 (72.1%)  | 2.09e-05 | 0.000427 | KEGG     |
| Protein processing in endoplasmic reticulum - Homo sapiens (human)   | 165  | 112 (67.9%) | 2.26e-05 | 0.000458 | KEGG     |
| Post-translational protein modification                              | 1383 | 791 (57.2%) | 2.33e-05 | 0.000468 | Reactome |
| Opioid Signalling                                                    | 82   | 61 (74.4%)  | 2.58e-05 | 0.000514 | Reactome |
| Regulation of TP53 Activity                                          | 162  | 110 (67.9%) | 2.6e-05  | 0.000514 | Reactome |
| Cell-Cell communication                                              | 124  | 87 (70.2%)  | 2.7e-05  | 0.000528 | Reactome |
| Collagen biosynthesis and modifying enzymes                          | 68   | 52 (76.5%)  | 2.78e-05 | 0.00054  | Reactome |
| Glucagon signaling pathway - Homo sapiens (human)                    | 103  | 74 (71.8%)  | 2.93e-05 | 0.00056  | KEGG     |

|                                                                        |     |             |          |          |          |
|------------------------------------------------------------------------|-----|-------------|----------|----------|----------|
| Circadian Clock                                                        | 35  | 30 (85.7%)  | 2.93e-05 | 0.00056  | Reactome |
| PI Metabolism                                                          | 84  | 62 (73.8%)  | 3.35e-05 | 0.000634 | Reactome |
| Beta-catenin independent WNT signaling                                 | 92  | 67 (72.8%)  | 3.39e-05 | 0.000637 | Reactome |
| sprouty regulation of tyrosine kinase signals                          | 20  | 19 (95.0%)  | 4.02e-05 | 0.000748 | BioCarta |
| Long-term potentiation - Homo sapiens (human)                          | 67  | 51 (76.1%)  | 4.13e-05 | 0.000764 | KEGG     |
| Transcriptional regulation by RUNX2                                    | 75  | 56 (74.7%)  | 4.6e-05  | 0.000837 | Reactome |
| Gastric acid secretion - Homo sapiens (human)                          | 75  | 56 (74.7%)  | 4.6e-05  | 0.000837 | KEGG     |
| Fc gamma R-mediated phagocytosis - Homo sapiens (human)                | 91  | 66 (72.5%)  | 4.81e-05 | 0.000868 | KEGG     |
| Thyroid cancer - Homo sapiens (human)                                  | 37  | 31 (83.8%)  | 5.42e-05 | 0.000957 | KEGG     |
| RHO GTPases Activate WASPs and WAVES                                   | 37  | 31 (83.8%)  | 5.42e-05 | 0.000957 | Reactome |
| Gap junction - Homo sapiens (human)                                    | 88  | 64 (72.7%)  | 5.43e-05 | 0.000957 | KEGG     |
| Calcium signaling pathway - Homo sapiens (human)                       | 186 | 123 (66.1%) | 5.93e-05 | 0.00103  | KEGG     |
| Intrinsic Pathway for Apoptosis                                        | 43  | 35 (81.4%)  | 5.94e-05 | 0.00103  | Reactome |
| Infectious disease                                                     | 253 | 162 (64.0%) | 6.3e-05  | 0.00109  | Reactome |
| bioactive peptide induced signaling pathway                            | 33  | 28 (84.8%)  | 8.06e-05 | 0.00138  | BioCarta |
| Collagen formation                                                     | 92  | 66 (71.7%)  | 8.4e-05  | 0.00143  | Reactome |
| TP53 Regulates Transcription of Cell Cycle Genes                       | 51  | 40 (78.4%)  | 8.72e-05 | 0.00147  | Reactome |
| MAP kinase activation                                                  | 65  | 49 (75.4%)  | 9.02e-05 | 0.0015   | Reactome |
| Interleukin-17 signaling                                               | 65  | 49 (75.4%)  | 9.02e-05 | 0.0015   | Reactome |
| Signaling by NOTCH                                                     | 120 | 83 (69.2%)  | 9.19e-05 | 0.00152  | Reactome |
| Human cytomegalovirus infection - Homo sapiens (human)                 | 225 | 145 (64.4%) | 9.51e-05 | 0.00155  | KEGG     |
| links between pyk2 and map kinases                                     | 26  | 23 (88.5%)  | 9.55e-05 | 0.00155  | BioCarta |
| Longevity regulating pathway - multiple species - Homo sapiens (human) | 62  | 47 (75.8%)  | 9.88e-05 | 0.00159  | KEGG     |
